# Supplementary material
Source: PubMed Central journal article supplement (PMC7865162)
Supplement: pnas.2009156118.sapp.pdf [file pnas.2009156118.sapp.pdf]

# PNAS

[www.pnas.org](http://www.pnas.org)

Supplementary Information for

**Direct evidence that KNDy neurons maintain gonadotropin pulses and folliculogenesis as the GnRH pulse generator**

Mayuko Nagae, Yoshihisa Uenoyama, Saki Okamoto, Hitomi Tsuchida, Kana Ikegami, Teppei Goto, Sutisa Majarune, Sho Nakamura, Makoto Sanbo, Masumi Hirabayashi, Kenta Kobayashi, Naoko Inoue and Hiroko Tsukamura

Corresponding author: Hiroko Tsukamura  
Email: [htsukamura@nagoya-u.jp](mailto:htsukamura@nagoya-u.jp)

**This PDF file includes:**

Figures S1 to S6  
Table S1

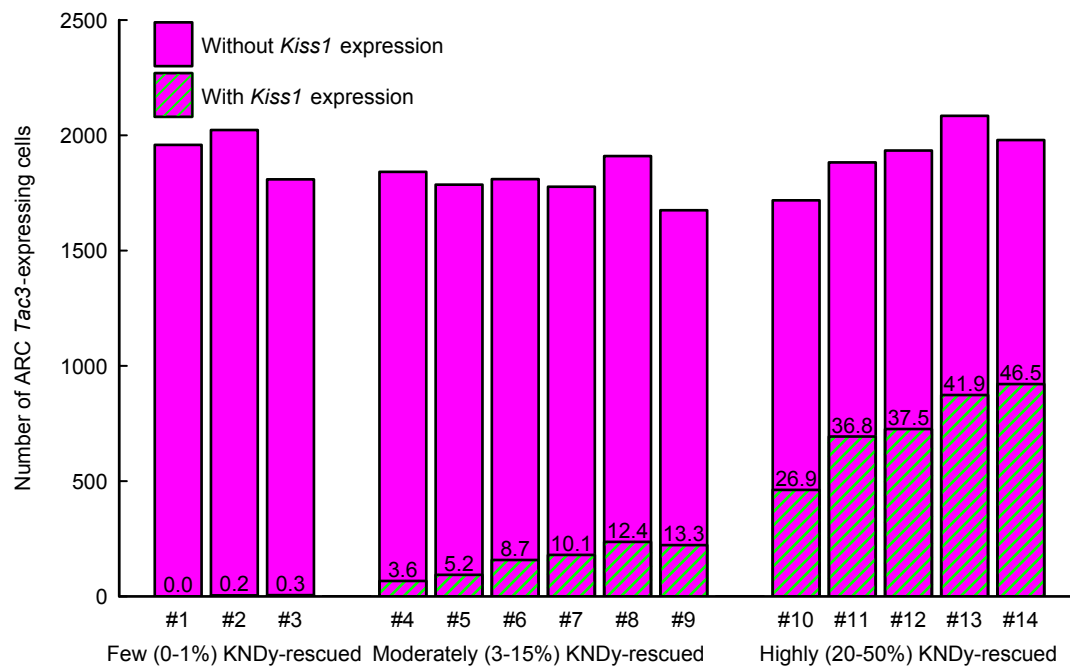

**Fig. S1.** The number of ARC *Tac3*-expressing cells with or without *Kiss1* expression in individual AAV-*Kiss1*-treated global *Kiss1* KO rats. According to the rescue rates of KNDy neurons by a transfecting CAG-driven *Kiss1* cDNA in *Tac3*-expressing neurons, the AAV-*Kiss1*-treated global *Kiss1* KO rats were divided into the three groups: few (0 to 1%), moderately (3 to 15%), and highly (20 to 50%) KNDy-rescued rats. Numbers in each column indicate the rescue rates of KNDy neurons out of *Tac3*-expressing cells in the ARC in each individual.

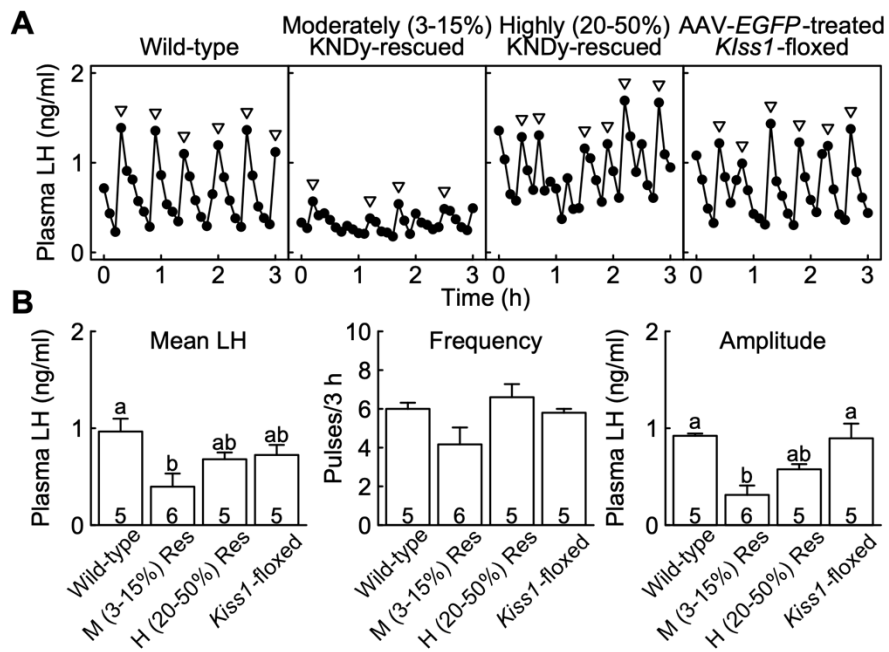

**Fig. S2.** Pulsatile LH secretion in wild-type and two genetically modified rats. (A) Plasma LH profiles in representative wild-type rats, moderately (3 to 15%) and highly (20 to 50%) KNDy-rescued rats, and AAV-EGFP-treated *Kiss1*-floxed rats. Arrowheads indicate LH pulses identified with the PULSAR computer program. (B) Mean LH concentration and the frequency and amplitude of LH pulses in the wild-type rats, moderately (3 to 15%) and highly (20 to 50%) KNDy-rescued rats, and AAV-EGFP-treated *Kiss1*-floxed rats. Values expressed in the bar graphs are mean  $\pm$  SEM. Numbers in each column indicate the number of animals used. The values with different letters were significantly different from each other ( $P < 0.05$ ) based on one-way ANOVA followed by Tukey's HSD test.

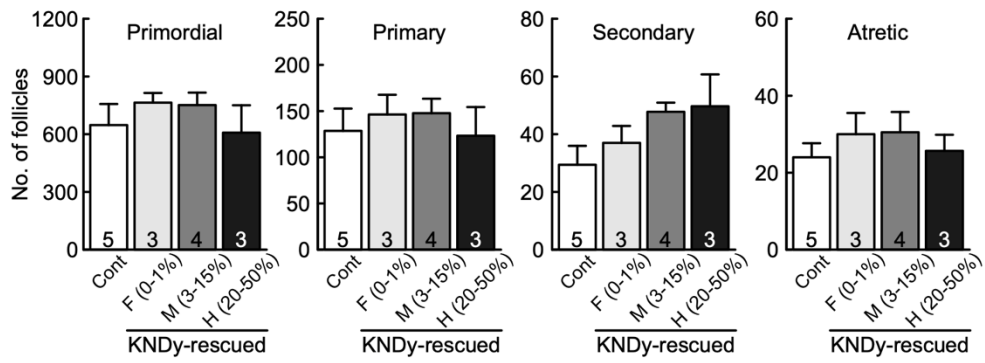

**Fig. S3.** The number of primordial, primary, secondary, and atretic follicles in the ovary of the KNDy neuron-rescued female rats. Values expressed in the bar graphs are mean  $\pm$  SEM. Numbers in each column indicate the number of animals used. No significant differences were detected by one-way ANOVA.

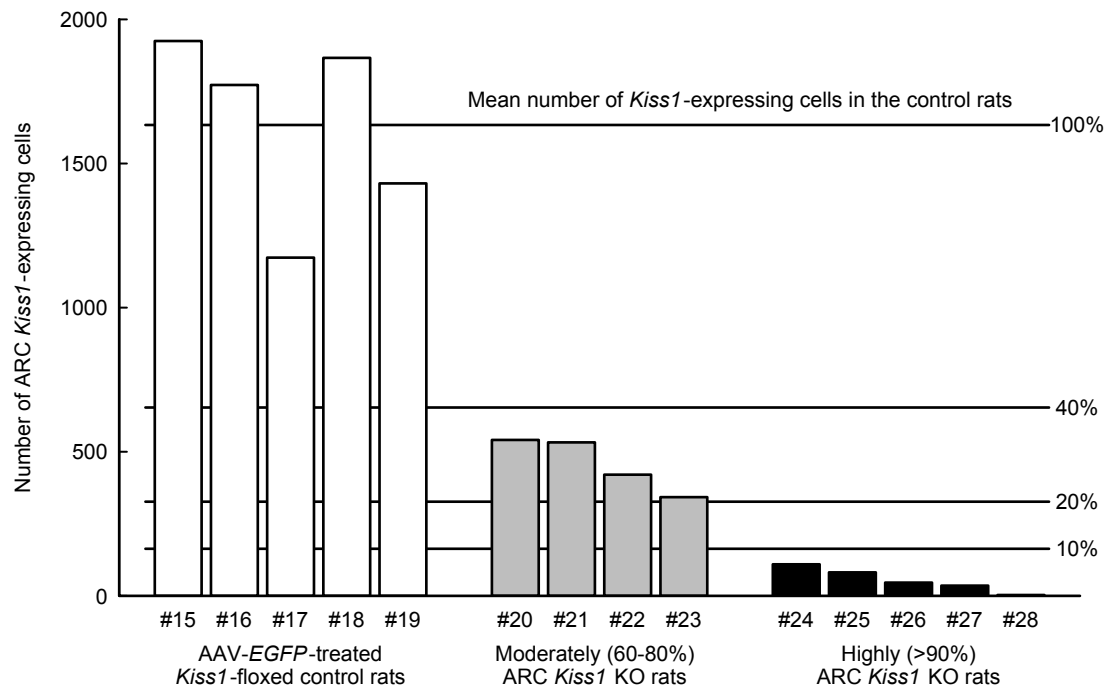

**Fig. S4.** The number of *Kiss1*-expressing cells in the ARC of individual AAV-*Cre*-treated *Kiss1*-floxed rats and AAV-EGFP-treated *Kiss1*-floxed control rats. According to the severity of ARC conditional *Kiss1* KO, AAV-*Cre*-treated *Kiss1*-floxed rats were divided into two groups: moderately (60 to 80%) ARC *Kiss1* KO rats, in which 20 to 40% *Kiss1*-expressing cells remained in the ARC and highly (>90%) ARC *Kiss1* KO rats, in which less than 10% *Kiss1*-expressing cells remained compared to the mean number of *Kiss1*-expressing cells in AAV-EGFP-treated *Kiss1*-floxed control rats, respectively.

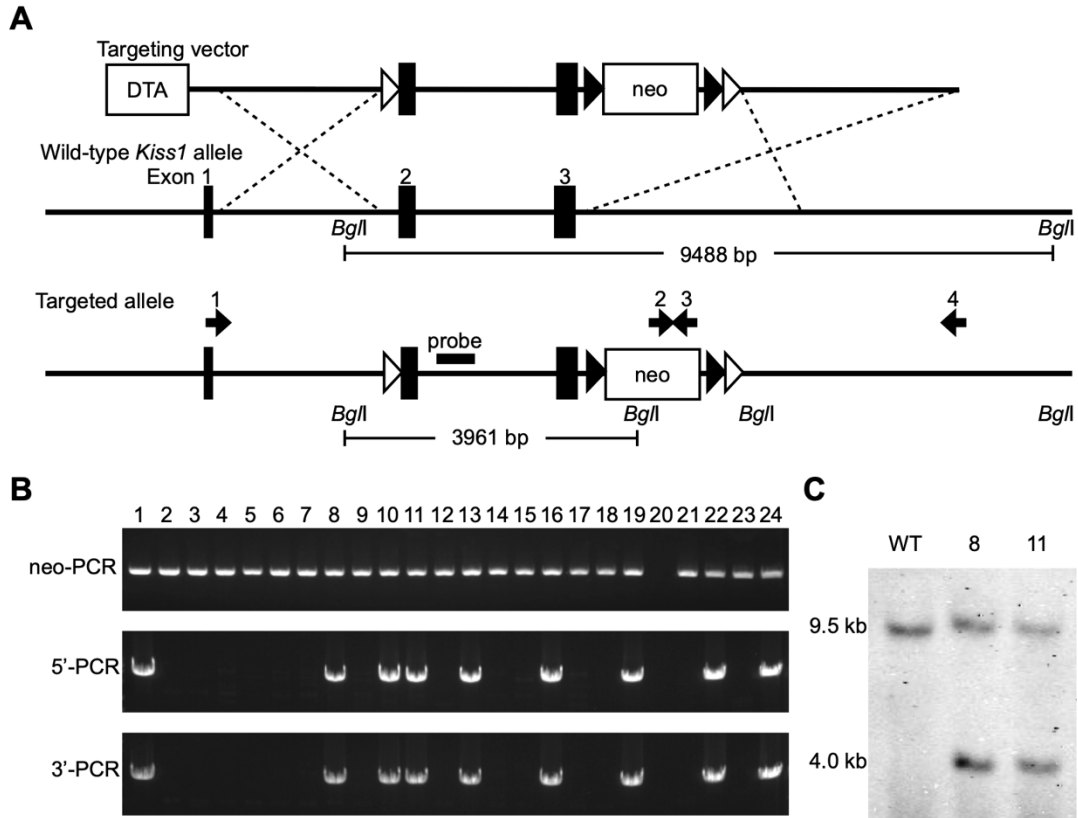

**Fig. S5.** Targeting of the *Kiss1* locus for the generation of *Kiss1*-floxed allele in rat ES cells. (A) Structure of the *Kiss1*-floxed targeting vector (top), the wild-type *Kiss1* allele (middle), and the targeted *Kiss1* allele (bottom), resulting from replacement recombination at the dotted lines. A diphtheria toxin A (DTA) expression cassette in the targeting vector was used for negative selection. (B) Screening of ES cells by PCR using primers (solid allows 1, 2, 3, and 4 in the panel A) located outside the 5' or 3' end of targeting vector and in the PGK-neo gene. Primer sets of neo-PCR (primers 2 and 3), 5'-PCR (primers 1 and 3), and 3'-PCR (primers 2 and 4) generate 691, 7011, and 4523 bp products, respectively, in the targeted *Kiss1*-floxed ES cells. (C) Southern blot analysis of *BglI*-digested DNA using a probe detected 4.0- and 9.5-kb fragments in the targeted *Kiss1* allele and wild-type *Kiss1* allele, respectively.

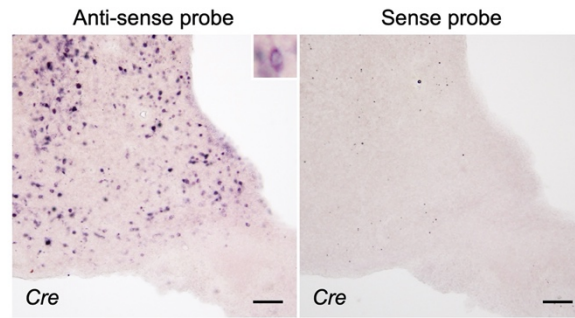

**Fig. S6.** *Cre*-expressing cells in the ARC of a representative AAV-*Cre*-treated *Kiss1*-floxed rat (left panel). *Inset* shows a representative *Cre*-expressing cell. No signals were found in section incubated with sense probe for *Cre* (right panel). (Scale bars, 100  $\mu$ m.)

**Table S1.** Primer sequences for the ES cell selection, probe preparation for Southern blot analysis, genotyping of global *Kiss1* KO and *Kiss1*-floxed rats, and qRT-PCR analyses.

| Purpose                      | Targets                                                 | Sequence<br>forward<br>reverse                             |
|------------------------------|---------------------------------------------------------|------------------------------------------------------------|
| ES cell selection            | neo-PCR                                                 | 5'-agaggctattcggctatgactg-3'<br>5'-gcgataccgtaaagcacgag-3' |
|                              | 5'-PCR                                                  | 5'-agtgtgctccaactaccaagt-3'<br>5'-gcgataccgtaaagcacgag-3'  |
|                              | 3'-PCR                                                  | 5'-agaggctattcggctatgactg-3'<br>5'-tgtcccagaaggaacctg-3'   |
| Southern blotting            | DNA probe                                               | 5'-gcctgtcaaccctaactcct-3'<br>5'-gttcaaaccacacacctgac-3'   |
| Genotyping                   | global <i>Kiss1</i> KO rats                             | 5'-ccttggtggggctatcct-3'<br>5'-gatgacggccatgtgtgt-3'       |
|                              | <i>Kiss1</i> -floxed rats                               | 5'-tcctgcctgacctaccaac-3'<br>5'-agtaccgatttggcaccag-3'     |
| qRT-PCR                      | <i>Lhb</i><br>(NM_012858.2, NM_001033975.1)             | 5'-atgagttctgccagctctgc-3'<br>5'-tggggaaggcacaggtcat-3'    |
|                              | <i>Fshb</i><br>(NM_001007597.2)                         | 5'-agctgttgacttacctggcc-3'<br>5'-gggtgttggtctagctggg-3'    |
|                              | <i>Gnrhr</i><br>(NM_031038.3)                           | 5'-ccagcctcatgatgggtgt-3'<br>5'-gggatgatgaacaggcagct-3'    |
|                              | <i>Cyp19a1</i><br>(NM_017085.2)                         | 5'-tggatggggattggaagtgc-3'<br>5'-cttgctgccgaatctggaga-3'   |
|                              | <i>Cyp17a1</i><br>(NM_012753.2)                         | 5'-ggtagggagacatcttgggg-3'<br>5'-ttctcgatagtgccctcca-3'    |
|                              | <i>Lhcgr</i><br>(NM_012978.1)                           | 5'-caccataccgggaatgctt-3'<br>5'-ggcctgcaatttgggtgaag-3'    |
|                              | <i>Fshr</i><br>(NM_199237.1)                            | 5'-gacagagattccgaccgacc-3'<br>5'-ctggggagattctggaaggc-3'   |
| <i>Actb</i><br>(NM_031144.3) | 5'-tgtcaccaactgggacgata-3'<br>5'-ggggtgtgaaggctcaaaa-3' |                                                            |

Gene symbols and protein names are as follows: *Actb*,  $\beta$ -actin; *Cyp17a1*, steroid 17 $\alpha$ -hydroxylase; *Cyp19a1*, aromatase; *Fshb*, FSH  $\beta$ -subunit; *Fshr*, FSH receptor; *Gnrhr*, GnRH receptor; *Kiss1*, kisspeptin; *Lhb*, LH  $\beta$ -subunit; and *Lhcgr*, LH/chorionic gonadotropin receptor.
